# Supplementary material
Source: publisher figshare collection journal article supplement (https://tandf.figshare.com/ndownloader/files/16766711)
Supplement: Supplementary file 1 [file 16766711]

| Appendix 1  *Items Measuring Populist Attitudes, Personal Relative Deprivation, and Collective Relative Deprivation* | |
| --- | --- |
| Item | *M (SD)* |
| **Populist attitudes** |  |
| MPs in Parliament very quickly lose touch with ordinary people. | 5.57 (1.41) |
| The differences between ordinary people and the ruling elite are much greater than the differences between ordinary people. | 5.39 (1.58) |
| People like me have no influence on what the government does. | 4.68 (1.88) |
| Politicians talk too much and take too little action. | 5.73 (1.46) |
| The people should have the final say on the most important political issues by voting on them directly in referendums. | 5.37 (1.77) |
| The people should be asked whenever important decisions are taken. | 5.50 (1.69) |
| The people, not the politicians, should make our most important policy decisions. | 4.97 (1.81) |
| The politicians in Parliament need to follow the will of the people. | 5.66 (1.48) |
| Ordinary people all pull together. | 3.56 (1.77) |
| Ordinary people are of good and honest character. | 3.96 (1.78) |
| Ordinary people share the same values and interests. | 4.05 (1.70) |
| Although the Germans are very different from each other, when it comes down to it they all think the same. | 3.82 (1.77) |
|  |  |
| **Personal relative deprivation** |  |
| I, personally, never get what I in fact deserve. | 3.27 (1.90) |
| I, personally, do not thrive in Germany. | 2.99 (1.91) |
| My whole living conditions are really poor. | 2.72 (1.82) |
|  |  |
| **Collective relative deprivation** |  |
| Whichever way you look at it, people like me never get what they in fact deserve in this society. | 4.33 (1.89) |
| In this society, people like me work really hard and do not receive anything in return. | 4.42 (1.89) |
| People like me are never spared in this society. | 4.23 (1.81) |

*Note:* *n* = 1,346. All items were measured on a seven-step scale from 1 = do not agree at all to 7 = fully agree.
